# Supplementary material for: Divergent tail and throat ornamentation in the barn swallow across the Japanese islands
Source: Springer Nature journal article supplement (doi:10.1007/s10164-012-0352-y), 2012-11-01
Supplement: MOESM1 [file 10164_2012_352_MOESM1_ESM.docx]

**Supplementary material 1**

Detailed information about recovery site

| Group | Pref | Latitude | Temperature | Male | Female |
| --- | --- | --- | --- | --- | --- |
| North | Hokkaido | 43.04 | 9.5 | 5 | 5 |
|  | Miyagi | 38.16 | 12.7 | 3 | 1 |
|  | Yamagata | 38.14 | 12.0 | 1 | 1 |
|  | Fukushima | 37.45 | 13.2 | 1 | 0 |
| Middle | Nagano | 36.39 | 12.2 | 6 | 1 |
|  | Tochigi | 36.34 | 14.3 | 2 | 1 |
|  | Tokyo | 35.41 | 16.4 | 9 | 3 |
|  | Yamanashi | 35.40 | 14.8 | 0 | 1 |
|  | Chiba | 35.36 | 16.1 | 1 | 1 |
|  | Shizuoka | 34.58 | 16.7 | 0 | 1 |
|  | Hyogo | 34.41 | 17.0 | 0 | 3 |
|  | Hiroshima | 34.23 | 16.4 | 1 | 1 |
|  | Ehime | 33.50 | 16.7 | 1 | 0 |
| South | Fukuoka | 33.36 | 17.1 | 5 | 3 |
|  | Miyazaki | 31.54 | 17.4 | 2 | 1 |
|  | Kagoshima | 31.33 | 23.4 | 1 | 3 |
|  |  |  | Total | 38 | 26 |

Classification into three groups (i.e. North, Middle, South: see text), name of prefecture, latitude of each prefecture (º), mean annual temperature (ºC), and the number of male and female specimens in each prefecture are shown. Latitude and mean annual temperature are represented with those of each prefectural capital. Information about temperature was obtained from Japan Meteorological Agency (2011).

**Supplementary material 2**

Results of GLM with a binomial error structure predicting variation in the number of broods reared (single/multiple) in after-second-year males during the breeding season of 2006 (n = 20).

| df Coef *χ*2 P |
| --- |
| Tail length 1 0.11 0.04 0.84  The size of 1 0.34 0.18 0.68  white tail spots  Red throat patch  Saturation † 1 –1.23 4.34 0.04  Patch size † 1 1.41 3.79 0.05 |

Coefficients, *χ*2-values and P-values of significant terms (P ≤ 0.05) are from the final model, whereas coefficients, *χ*2 -values, and P-values of non-significant terms are from the final model and each non-significant term added separately. Note that small saturation value indicates colorful males (Detailed information is given in Hasegawa et al. 2010).

† indicates the variables retained in the final models.
